# Supplementary material for: Comprehensive network of miRNA-induced intergenic interactions and a biological role of its core in cancer
Source: PubMed Central journal article supplement (PMC5799291; doi:10.1038/s41598-018-20215-5), 2018-02-05
Supplement: 41598_2018_20215_MOESM1_ESM.pdf [file 41598_2018_20215_MOESM1_ESM.pdf]

# Comprehensive network of miRNA-induced intergenic interactions and a biological role of its core in cancer

Vladimir V. Galatenko, Alexey V. Galatenko, Timur R. Samatov, Andrey A. Turchinovich, Maxim Yu. Shkurnikov, Julia A. Makarova, Alexander G. Tonevitsky

## Supplementary Information

### Network core: a simple example

In order to illustrate the definition of the network core, let us consider the following simple network.

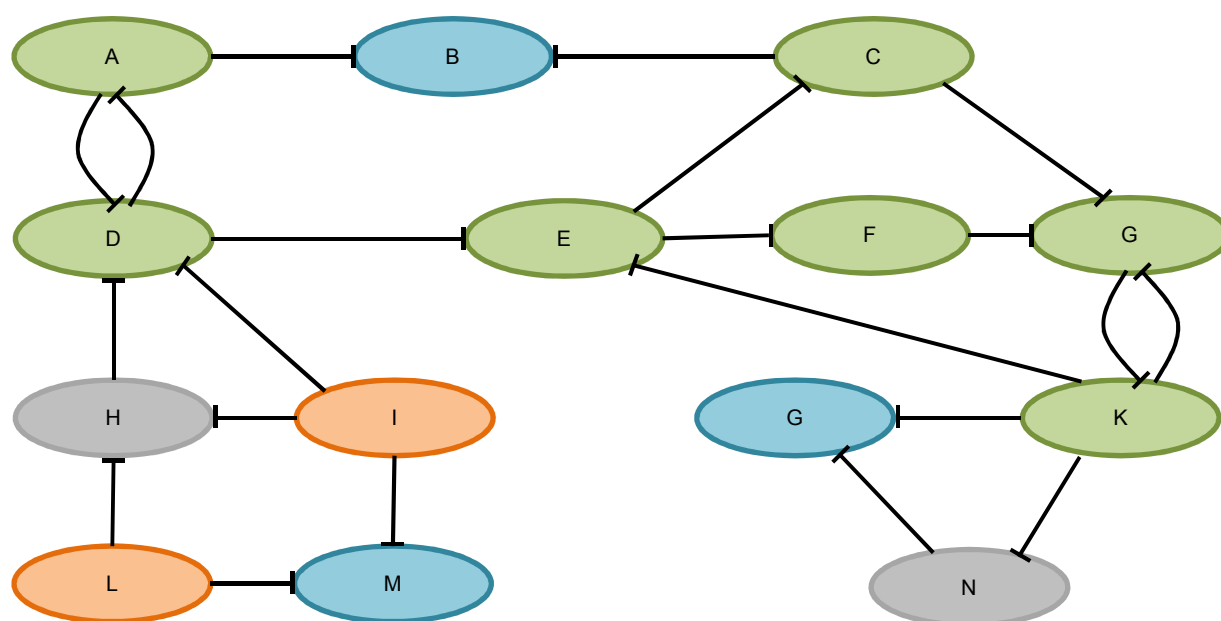

**Supplementary Figure 1 | A simple example of a network.** Nodes comprising the network core are colored in green. All these nodes have both in-edges and out-edges. The remaining nodes are colored in gray if they also have both in-edges and out-edges, in orange if they have only out-edges (and no in-edges), and in blue if they have only in-edges (and no out-edges). Overall the network contains 9 nodes with both in- and out-edges, 2 nodes with only out-edges and 3 nodes with only in-edges.

This network has two nontrivial (i.e., containing at least two nodes) strongly connected components:  $\{A, D\}$  and  $\{C, E, F, G, K\}$ . In each component every node is reachable from every other node via a directed path. E.g., node C is reachable from node F via a path

$$F \rightarrow G \rightarrow K \rightarrow E \rightarrow C.$$

Nodes B, G and N are reachable from the component  $\{C, E, F, G, K\}$ , but they do not belong to this component as the opposite reachability is violated (i.e., there is no directed path from these nodes to the nodes of the component). Similarly, the component  $\{A, D\}$  is reachable from nodes H, I and L, but these nodes can't be added to the component due to absence of reverse reachability.

## The enrichment analysis of lists of nodes with the highest in-degree

Lists of network nodes with in-degrees of at least 10 were formed. For the F-network, this list consisted of 142 genes (these are genes that are targeted by intragenic miRNAs of at least 10 other genes). For the IS-network, this list consisted of 90 genes (these are genes that are targeted by intronic sense miRNAs of at least 10 other genes).

Functional categories overrepresented in these lists were identified using DAVID 6.7 online service. These categories are presented in Supplementary Tables 1-4.

**Supplementary Table 1 | Categories (terms) overrepresented in the list of genes with the highest in-degree in the F-network.** All categories with Benjamini-corrected p-values less than 0.05 are listed.

| Category        | Term                                                                 | Count | %    | Fold Enrichment | P-Value                | Benjamini              |
|-----------------|----------------------------------------------------------------------|-------|------|-----------------|------------------------|------------------------|
| SP_PIR_KEYWORDS | Phosphoprotein                                                       | 97    | 71.3 | 1.9             | $3.24 \times 10^{-15}$ | $6.63 \times 10^{-13}$ |
| SP_PIR_KEYWORDS | Acetylation                                                          | 47    | 34.6 | 2.5             | $1.40 \times 10^{-9}$  | $9.61 \times 10^{-8}$  |
| SP_PIR_KEYWORDS | rna-binding                                                          | 21    | 15.4 | 5.5             | $1.23 \times 10^{-9}$  | $1.27 \times 10^{-7}$  |
| KEGG_PATHWAY    | hsa04110:Cell cycle                                                  | 11    | 8.1  | 9.3             | $1.35 \times 10^{-7}$  | $1.09 \times 10^{-5}$  |
| KEGG_PATHWAY    | hsa05220:Chronic myeloid leukemia                                    | 9     | 6.6  | 12.7            | $3.04 \times 10^{-7}$  | $1.23 \times 10^{-5}$  |
| SP_PIR_KEYWORDS | Cytoplasm                                                            | 49    | 36.0 | 2.1             | $2.68 \times 10^{-7}$  | $1.38 \times 10^{-5}$  |
| KEGG_PATHWAY    | hsa05200:Pathways in cancer                                          | 15    | 11.0 | 4.8             | $7.98 \times 10^{-7}$  | $2.15 \times 10^{-5}$  |
| KEGG_PATHWAY    | hsa05214:Glioma                                                      | 8     | 5.9  | 13.5            | $1.36 \times 10^{-6}$  | $2.75 \times 10^{-5}$  |
| KEGG_PATHWAY    | hsa05219:Bladder cancer                                              | 7     | 5.1  | 17.7            | $1.83 \times 10^{-6}$  | $2.97 \times 10^{-5}$  |
| KEGG_PATHWAY    | hsa04115:p53 signaling pathway                                       | 8     | 5.9  | 12.5            | $2.30 \times 10^{-6}$  | $3.11 \times 10^{-5}$  |
| SP_PIR_KEYWORDS | ubl conjugation                                                      | 18    | 13.2 | 4.3             | $8.04 \times 10^{-7}$  | $3.31 \times 10^{-5}$  |
| GOTERM_BP_FAT   | GO:0010608~posttranscriptional regulation of gene expression         | 14    | 10.3 | 7.8             | $2.42 \times 10^{-8}$  | $3.32 \times 10^{-5}$  |
| KEGG_PATHWAY    | hsa05218:Melanoma                                                    | 8     | 5.9  | 11.9            | $3.09 \times 10^{-6}$  | $3.58 \times 10^{-5}$  |
| SP_PIR_KEYWORDS | nucleus                                                              | 56    | 41.2 | 1.8             | $1.06 \times 10^{-6}$  | $3.62 \times 10^{-5}$  |
| SP_PIR_KEYWORDS | cell cycle control                                                   | 6     | 4.4  | 2<br>7.4        | $2.32 \times 10^{-6}$  | $6.83 \times 10^{-5}$  |
| GOTERM_BP_FAT   | GO:0010941~regulation of cell death                                  | 24    | 17.6 | 3.5             | $2.46 \times 10^{-7}$  | $8.42 \times 10^{-5}$  |
| GOTERM_CC_FAT   | GO:0000307~cyclin-dependent protein kinase holoenzyme complex        | 5     | 3.7  | 61.8            | $8.33 \times 10^{-7}$  | $9.83 \times 10^{-5}$  |
| GOTERM_BP_FAT   | GO:0043067~regulation of programmed cell death                       | 24    | 17.6 | 3.5             | $2.31 \times 10^{-7}$  | $1.05 \times 10^{-4}$  |
| SP_PIR_KEYWORDS | atp-binding                                                          | 26    | 19.1 | 2.8             | $5.06 \times 10^{-6}$  | $1.30 \times 10^{-4}$  |
| GOTERM_BP_FAT   | GO:0042981~regulation of apoptosis                                   | 24    | 17.6 | 3.5             | $1.93 \times 10^{-7}$  | $1.32 \times 10^{-4}$  |
| KEGG_PATHWAY    | hsa05215:Prostate cancer                                             | 8     | 5.9  | 9.5             | $1.41 \times 10^{-5}$  | $1.43 \times 10^{-4}$  |
| GOTERM_CC_FAT   | GO:0031981~nuclear lumen                                             | 29    | 21.3 | 2.7             | $7.77 \times 10^{-7}$  | $1.83 \times 10^{-4}$  |
| GOTERM_BP_FAT   | GO:0010629~negative regulation of gene expression                    | 18    | 13.2 | 4.2             | $1.03 \times 10^{-6}$  | $2.81 \times 10^{-4}$  |
| GOTERM_CC_FAT   | GO:0031974~membran×10-enclosed lumen                                 | 32    | 23.5 | 2.3             | $3.76 \times 10^{-6}$  | $2.95 \times 10^{-4}$  |
| GOTERM_MF_FAT   | GO:0003723~RNA binding                                               | 22    | 16.2 | 3.4             | $1.13 \times 10^{-6}$  | $3.42 \times 10^{-4}$  |
| GOTERM_CC_FAT   | GO:0043233~organelle lumen                                           | 31    | 22.8 | 2.3             | $7.57 \times 10^{-6}$  | $4.47 \times 10^{-4}$  |
| GOTERM_BP_FAT   | GO:0042127~regulation of cell proliferation                          | 22    | 16.2 | 3.3             | $2.20 \times 10^{-6}$  | $5.02 \times 10^{-4}$  |
| SP_PIR_KEYWORDS | cell cycle                                                           | 14    | 10.3 | 4.3             | $2.24 \times 10^{-5}$  | $5.12 \times 10^{-4}$  |
| SP_PIR_KEYWORDS | cyclin                                                               | 6     | 4.4  | 17.0            | $2.60 \times 10^{-5}$  | $5.35 \times 10^{-4}$  |
| KEGG_PATHWAY    | hsa04510:Focal adhesion                                              | 10    | 7.4  | 5.3             | $7.27 \times 10^{-5}$  | $6.54 \times 10^{-4}$  |
| SP_PIR_KEYWORDS | nucleotid×10-binding                                                 | 28    | 20.6 | 2.3             | $3.85 \times 10^{-5}$  | $6.62 \times 10^{-4}$  |
| GOTERM_CC_FAT   | GO:0070013~intracellular organelle lumen                             | 30    | 22.1 | 2.3             | $1.43 \times 10^{-5}$  | $6.73 \times 10^{-4}$  |
| SP_PIR_KEYWORDS | Proto-oncogene                                                       | 10    | 7.4  | 6.1             | $3.62 \times 10^{-5}$  | $6.78 \times 10^{-4}$  |
| KEGG_PATHWAY    | hsa05222:Small cell lung cancer                                      | 7     | 5.1  | 8.8             | $1.06 \times 10^{-4}$  | $8.59 \times 10^{-4}$  |
| SP_PIR_KEYWORDS | repressor                                                            | 13    | 9.6  | 4.2             | $5.79 \times 10^{-5}$  | $9.17 \times 10^{-4}$  |
| GOTERM_BP_FAT   | GO:0007167~enzyme linked receptor protein signaling pathway          | 14    | 10.3 | 4.8             | $5.97 \times 10^{-6}$  | 0.001165               |
| SP_PIR_KEYWORDS | Apoptosis                                                            | 12    | 8.8  | 4.5             | $7.96 \times 10^{-5}$  | 0.00117                |
| GOTERM_BP_FAT   | GO:0008284~positive regulation of cell proliferation                 | 15    | 11.0 | 4.3             | $9.77 \times 10^{-6}$  | 0.00167                |
| GOTERM_BP_FAT   | GO:0010942~positive regulation of cell death                         | 15    | 11.0 | 4.1             | $1.70 \times 10^{-5}$  | 0.001792               |
| GOTERM_BP_FAT   | GO:0009891~positive regulation of biosynthetic process               | 19    | 14.0 | 3.2             | $1.93 \times 10^{-5}$  | 0.001886               |
| INTERPRO        | IPR012677:Nucleotid×10-binding, alpha-beta plait                     | 11    | 8.1  | 6.6             | $6.63 \times 10^{-6}$  | 0.001914               |
| GOTERM_BP_FAT   | GO:0048008~platelet-derived growth factor receptor signaling pathway | 5     | 3.7  | 31.0            | $1.68 \times 10^{-5}$  | 0.001915               |
| GOTERM_BP_FAT   | GO:0043068~positive regulation of programmed cell death              | 15    | 11.0 | 4.1             | $1.62 \times 10^{-5}$  | 0.002011               |
| GOTERM_BP_FAT   | GO:0031328~positive regulation of cellular biosynthetic process      | 19    | 14.0 | 3.3             | $1.59 \times 10^{-5}$  | 0.002174               |
| GOTERM_CC_FAT   | GO:0005654~nucleoplasm                                               | 19    | 14.0 | 2.9             | $5.56 \times 10^{-5}$  | 0.002185               |
| GOTERM_BP_FAT   | GO:0043065~positive regulation of apoptosis                          | 15    | 11.0 | 4.1             | $1.50 \times 10^{-5}$  | 0.002274               |
| UP_SEQ_FEATURE  | mutagenesis site                                                     | 34    | 25.0 | 2.3             | $4.10 \times 10^{-6}$  | 0.002337               |

| Category        | Term                                                                        | Count | %    | Fold Enrichment | P-Value               | Benjamini |
|-----------------|-----------------------------------------------------------------------------|-------|------|-----------------|-----------------------|-----------|
| GOTERM_BP_FAT   | GO:0010605~negative regulation of macromolecule metabolic process           | 19    | 14.0 | 3.0             | $3.98 \times 10^{-5}$ | 0.003624  |
| SP_PIR_KEYWORDS | ATP                                                                         | 9     | 6.6  | 5.4             | $2.65 \times 10^{-4}$ | 0.003636  |
| GOTERM_BP_FAT   | GO:0043066~negative regulation of apoptosis                                 | 13    | 9.6  | 4.3             | $4.30 \times 10^{-5}$ | 0.003671  |
| GOTERM_BP_FAT   | GO:0060548~negative regulation of cell death                                | 13    | 9.6  | 4.2             | $5.06 \times 10^{-5}$ | 0.003839  |
| SP_PIR_KEYWORDS | serine/threonin×10-protein kinase                                           | 11    | 8.1  | 4.1             | $3.62 \times 10^{-4}$ | 0.003923  |
| SP_PIR_KEYWORDS | activator                                                                   | 13    | 9.6  | 3.5             | $3.05 \times 10^{-4}$ | 0.003924  |
| UP_SEQ_FEATURE  | nucleotide phosphat×10-binding region:ATP                                   | 21    | 15.4 | 3.1             | $1.38 \times 10^{-5}$ | 0.003938  |
| GOTERM_BP_FAT   | GO:0043069~negative regulation of programmed cell death                     | 13    | 9.6  | 4.3             | $4.93 \times 10^{-5}$ | 0.003957  |
| SP_PIR_KEYWORDS | Kinase                                                                      | 15    | 11.0 | 3.1             | $3.46 \times 10^{-4}$ | 0.003958  |
| SP_PIR_KEYWORDS | transcription regulation                                                    | 29    | 21.3 | 2.0             | $3.40 \times 10^{-4}$ | 0.004116  |
| BIOCARTA        | h_cellcyclePathway:Cyclins and Cell Cycle Regulation                        | 6     | 4.4  | 11.5            | $9.39 \times 10^{-5}$ | 0.004356  |
| SP_PIR_KEYWORDS | Transcription                                                               | 29    | 21.3 | 2.0             | $4.86 \times 10^{-4}$ | 0.004991  |
| GOTERM_BP_FAT   | GO:0012502~induction of programmed cell death                               | 12    | 8.8  | 4.4             | $8.27 \times 10^{-5}$ | 0.005129  |
| GOTERM_MF_FAT   | GO:0000166~nucleotide binding                                               | 38    | 27.9 | 1.9             | $6.97 \times 10^{-5}$ | 0.005266  |
| GOTERM_BP_FAT   | GO:0007049~cell cycle                                                       | 19    | 14.0 | 2.9             | $8.18 \times 10^{-5}$ | 0.005312  |
| GOTERM_MF_FAT   | GO:0019904~protein domain specific binding                                  | 13    | 9.6  | 4.4             | $3.62 \times 10^{-5}$ | 0.005476  |
| GOTERM_BP_FAT   | GO:0006917~induction of apoptosis                                           | 12    | 8.8  | 4.4             | $8.04 \times 10^{-5}$ | 0.005486  |
| GOTERM_BP_FAT   | GO:0010604~positive regulation of macromolecule metabolic process           | 20    | 14.7 | 2.7             | $9.25 \times 10^{-5}$ | 0.005489  |
| GOTERM_BP_FAT   | GO:0022402~cell cycle process                                               | 16    | 11.8 | 3.3             | $7.76 \times 10^{-5}$ | 0.005571  |
| GOTERM_BP_FAT   | GO:0045449~regulation of transcription                                      | 40    | 29.4 | 1.8             | $1.09 \times 10^{-4}$ | 0.005699  |
| GOTERM_MF_FAT   | GO:0019899~enzyme binding                                                   | 16    | 11.8 | 3.4             | $5.69 \times 10^{-5}$ | 0.005734  |
| GOTERM_BP_FAT   | GO:0016265~death                                                            | 18    | 13.2 | 2.9             | $1.14 \times 10^{-4}$ | 0.005744  |
| GOTERM_BP_FAT   | GO:0010033~response to organic substance                                    | 18    | 13.2 | 2.9             | $1.08 \times 10^{-4}$ | 0.005899  |
| GOTERM_BP_FAT   | GO:0008219~cell death                                                       | 18    | 13.2 | 2.9             | $1.05 \times 10^{-4}$ | 0.00594   |
| INTERPRO        | IPR000504:RNA recognition motif, RNP-1                                      | 10    | 7.4  | 6.0             | $4.15 \times 10^{-5}$ | 0.005973  |
| BIOCARTA        | h_RacCycDPPathway:Influence of Ras and Rho proteins on G1 to S Transition   | 6     | 4.4  | 12.0            | $7.62 \times 10^{-5}$ | 0.007059  |
| GOTERM_BP_FAT   | GO:0051252~regulation of RNA metabolic process                              | 31    | 22.8 | 2.0             | $1.68 \times 10^{-4}$ | 0.008167  |
| GOTERM_BP_FAT   | GO:0022403~cell cycle phase                                                 | 13    | 9.6  | 3.7             | $1.90 \times 10^{-4}$ | 0.008617  |
| GOTER_BP_FAT    | GO:0012501~programmed cell death                                            | 16    | 11.8 | 3.1             | $1.84 \times 10^{-4}$ | 0.008655  |
| GOTERM_BP_FAT   | GO:0051329~interphase of mitotic cell cycle                                 | 7     | 5.1  | 8.0             | $2.31 \times 10^{-4}$ | 0.010141  |
| GOTERM_BP_FAT   | GO:0051325~interphase                                                       | 7     | 5.1  | 7.8             | $2.70 \times 10^{-4}$ | 0.011477  |
| SP_PIR_KEYWORDS | dna-binding                                                                 | 26    | 19.1 | 2.0             | 0.001186              | 0.011569  |
| SP_PIR_KEYWORDS | translation regulation                                                      | 5     | 3.7  | 10.6            | 0.001263              | 0.011767  |
| GOTERM_BP_FAT   | GO:0048534~hemopoietic or lymphoid organ development                        | 10    | 7.4  | 4.5             | $3.49 \times 10^{-4}$ | 0.014346  |
| GOTERM_BP_FAT   | GO:0010557~positive regulation of macromolecule biosynthetic process        | 16    | 11.8 | 2.9             | $3.82 \times 10^{-4}$ | 0.015256  |
| SP_PIR_KEYWORDS | isopeptide bond                                                             | 9     | 6.6  | 4.0             | 0.001881              | 0.016719  |
| GOTERM_BP_FAT   | GO:0006468~protein amino acid phosphorylation                               | 16    | 11.8 | 2.8             | $4.70 \times 10^{-4}$ | 0.018201  |
| GOTERM_BP_FAT   | GO:0016481~negative regulation of transcription                             | 13    | 9.6  | 3.3             | $4.85 \times 10^{-4}$ | 0.018249  |
| GOTERM_BP_FAT   | GO:0002520~immune system development                                        | 10    | 7.4  | 4.3             | $5.38 \times 10^{-4}$ | 0.019183  |
| GOTERM_BP_FAT   | GO:0006915~apoptosis                                                        | 15    | 11.0 | 2.9             | $5.28 \times 10^{-4}$ | 0.019335  |
| GOTERM_BP_FAT   | GO:0007169~transmembrane receptor protein tyrosine kinase signaling pathway | 9     | 6.6  | 4.7             | $6.09 \times 10^{-4}$ | 0.021154  |
| GOTERM_BP_FAT   | GO:0032268~regulation of cellular protein metabolic process                 | 13    | 9.6  | 3.2             | $6.44 \times 10^{-4}$ | 0.021802  |
| SP_PIR_KEYWORDS | cell division                                                               | 8     | 5.9  | 4.3             | 0.002644              | 0.022466  |
| GOTERM_BP_FAT   | GO:0007423~sensory organ development                                        | 9     | 6.6  | 4.6             | $7.04 \times 10^{-4}$ | 0.022684  |
| GOTERM_BP_FAT   | GO:0010558~negative regulation of macromolecule biosynthetic process        | 14    | 10.3 | 3.0             | $6.90 \times 10^{-4}$ | 0.022757  |
| GOTERM_BP_FAT   | GO:0045892~negative regulation of transcription, DNA-dependent              | 11    | 8.1  | 3.6             | $8.44 \times 10^{-4}$ | 0.026513  |
| SMART           | SM00360:RRM                                                                 | 10    | 7.4  | 4.5             | $3.21 \times 10^{-4}$ | 0.026592  |
| GOTERM_BP_FAT   | GO:0031327~negative regulation of cellular biosynthetic process             | 14    | 10.3 | 2.9             | $8.71 \times 10^{-4}$ | 0.026732  |
| GOTERM_BP_FAT   | GO:0051253~negative regulation of RNA metabolic process                     | 11    | 8.1  | 3.6             | $9.59 \times 10^{-4}$ | 0.028741  |
| GOTERM_BP_FAT   | GO:0009890~negative regulation of biosynthetic process                      | 14    | 10.3 | 2.9             | 0.001057              | 0.029099  |
| SP_PIR_KEYWORDS | chromosomal rearrangement                                                   | 8     | 5.9  | 4.1             | 0.003587              | 0.029173  |
| GOTERM_BP_FAT   | GO:0051173~positive regulation of nitrogen compound metabolic process       | 15    | 11.0 | 2.7             | 0.00102               | 0.029259  |
| GOTERM_BP_FAT   | GO:0000079~regulation of cyclin-dependent protein kinase activity           | 5     | 3.7  | 10.9            | 0.001093              | 0.029491  |
| GOTERM_BP_FAT   | GO:0006417~regulation of translation                                        | 7     | 5.1  | 6.0             | 0.001054              | 0.029596  |
| GOTERM_BP_FAT   | GO:0001889~liver development                                                | 5     | 3.7  | 11.1            | 0.001019              | 0.029866  |

| Category        | Term                                                                                                    | Count | %    | Fold Enrichment | P-Value               | Benjamini |
|-----------------|---------------------------------------------------------------------------------------------------------|-------|------|-----------------|-----------------------|-----------|
| GOTERM_BP_FAT   | GO:0000278~mitotic cell cycle                                                                           | 11    | 8.1  | 3.5             | 0.001131              | 0.029903  |
| KEGG_PATHWAY    | hsa05212:Pancreatic cancer                                                                              | 5     | 3.7  | 7.4             | 0.004164              | 0.030257  |
| GOTERM_BP_FAT   | GO:0045934~negative regulation of nucleobase, nucleoside, nucleotide and nucleic acid metabolic process | 13    | 9.6  | 3.0             | 0.001257              | 0.031369  |
| SP_PIR_KEYWORDS | host-virus interaction                                                                                  | 8     | 5.9  | 4.0             | 0.004028              | 0.031475  |
| GOTERM_BP_FAT   | GO:0051270~regulation of cell motion                                                                    | 8     | 5.9  | 4.9             | 0.001228              | 0.031801  |
| GOTERM_BP_FAT   | GO:0016458~gene silencing                                                                               | 5     | 3.7  | 10.5            | 0.001254              | 0.031861  |
| GOTERM_BP_FAT   | GO:0000082~G1/S transition of mitotic cell cycle                                                        | 5     | 3.7  | 10.5            | 0.001254              | 0.031861  |
| GOTERM_BP_FAT   | GO:0006355~regulation of transcription, DNA-dependent                                                   | 28    | 20.6 | 1.9             | 0.001412              | 0.033927  |
| GOTERM_BP_FAT   | GO:0051172~negative regulation of nitrogen compound metabolic process                                   | 13    | 9.6  | 2.9             | 0.001411              | 0.034516  |
| INTERPRO        | IPR017442:Serine/threonine protein kinas×10-related                                                     | 11    | 8.1  | 3.9             | 5.14×10 <sup>-4</sup> | 0.036485  |
| SP_PIR_KEYWORDS | protein kinase inhibitor                                                                                | 3     | 2.2  | 26.5            | 0.005501              | 0.041215  |
| GOTERM_BP_FAT   | GO:0006916~anti-apoptosis                                                                               | 8     | 5.9  | 4.6             | 0.001785              | 0.041964  |
| INTERPRO        | IPR008271:Serine/threonine protein kinase, active site                                                  | 11    | 8.1  | 4.0             | 4.61×10 <sup>-4</sup> | 0.043451  |
| GOTERM_MF_FAT   | GO:0004674~protein serine/threonine kinase activity                                                     | 12    | 8.8  | 3.1             | 0.001493              | 0.044273  |
| GOTERM_BP_FAT   | GO:0043627~response to estrogen stimulus                                                                | 6     | 4.4  | 6.7             | 0.001924              | 0.044409  |
| GOTERM_MF_FAT   | GO:0019900~kinase binding                                                                               | 8     | 5.9  | 5.0             | 0.001056              | 0.044722  |
| GOTERM_MF_FAT   | GO:0032559~adenyl ribonucleotide binding                                                                | 26    | 19.1 | 1.9             | 0.001223              | 0.045299  |
| GOTERM_BP_FAT   | GO:0045768~positive regulation of anti-apoptosis                                                        | 4     | 2.9  | 15.7            | 0.002005              | 0.045464  |
| GOTERM_MF_FAT   | GO:0030528~transcription regulator activity                                                             | 26    | 19.1 | 1.9             | 0.001409              | 0.046366  |
| KEGG_PATHWAY    | hsa05210:Colorectal cancer                                                                              | 5     | 3.7  | 6.3             | 0.007204              | 0.04763   |
| GOTERM_BP_FAT   | GO:0060541~respiratory system development                                                               | 6     | 4.4  | 6.5             | 0.002177              | 0.048482  |
| INTERPRO        | IPR017441:Protein kinase, ATP binding site                                                              | 12    | 8.8  | 3.4             | 8.79×10 <sup>-4</sup> | 0.049551  |
| KEGG_PATHWAY    | hsa04012:ErbB signaling pathway                                                                         | 5     | 3.7  | 6.1             | 0.008145              | 0.04968   |
| GOTERM_MF_FAT   | GO:0005524~ATP binding                                                                                  | 26    | 19.1 | 2.0             | 0.001009              | 0.049687  |

**Supplementary Table 2 | Categories (terms) overrepresented in the list of genes with the highest in-degree in the IS-network.** All categories with Benjamini-corrected p-values less than 0.05 are listed.

| Category        | Term                                                          | Count | %    | Fold Enrichment | P-Value               | Benjamini             |
|-----------------|---------------------------------------------------------------|-------|------|-----------------|-----------------------|-----------------------|
| SP_PIR_KEYWORDS | phosphoprotein                                                | 60    | 69.8 | 1.8             | 3.07×10 <sup>-9</sup> | 4.79×10 <sup>-7</sup> |
| KEGG_PATHWAY    | hsa04110:Cell cycle                                           | 9     | 10.5 | 12.6            | 2.19×10 <sup>-7</sup> | 1.16×10 <sup>-5</sup> |
| KEGG_PATHWAY    | hsa04115:p53 signaling pathway                                | 7     | 8.1  | 18.1            | 1.37×10 <sup>-6</sup> | 3.62×10 <sup>-5</sup> |
| SP_PIR_KEYWORDS | Cytoplasm                                                     | 34    | 39.5 | 2.3             | 2.09×10 <sup>-6</sup> | 1.09×10 <sup>-4</sup> |
| SP_PIR_KEYWORDS | ubl conjugation                                               | 14    | 16.3 | 5.3             | 1.75×10 <sup>-6</sup> | 1.37×10 <sup>-4</sup> |
| KEGG_PATHWAY    | hsa05214:Glioma                                               | 6     | 7.0  | 16.7            | 1.96×10 <sup>-5</sup> | 3.46×10 <sup>-4</sup> |
| KEGG_PATHWAY    | hsa05220:Chronic myeloid leukemia                             | 6     | 7.0  | 14.0            | 4.60×10 <sup>-5</sup> | 4.06×10 <sup>-4</sup> |
| KEGG_PATHWAY    | hsa05200:Pathways in cancer                                   | 10    | 11.6 | 5.3             | 4.00×10 <sup>-5</sup> | 4.24×10 <sup>-4</sup> |
| KEGG_PATHWAY    | hsa05218:Melanoma                                             | 6     | 7.0  | 14.8            | 3.52×10 <sup>-5</sup> | 4.67×10 <sup>-4</sup> |
| KEGG_PATHWAY    | hsa05222:Small cell lung cancer                               | 6     | 7.0  | 12.5            | 7.95×10 <sup>-5</sup> | 4.68×10 <sup>-4</sup> |
| KEGG_PATHWAY    | hsa04510:Focal adhesion                                       | 8     | 9.3  | 7.0             | 7.92×10 <sup>-5</sup> | 5.25×10 <sup>-4</sup> |
| KEGG_PATHWAY    | hsa05219:Bladder cancer                                       | 5     | 5.8  | 20.9            | 7.13×10 <sup>-5</sup> | 5.40×10 <sup>-4</sup> |
| KEGG_PATHWAY    | hsa05215:Prostate cancer                                      | 6     | 7.0  | 11.8            | 1.05×10 <sup>-4</sup> | 5.56×10 <sup>-4</sup> |
| UP_SEQ_FEATURE  | mutagenesis site                                              | 26    | 30.2 | 2.8             | 1.71×10 <sup>-6</sup> | 7.02×10 <sup>-4</sup> |
| SP_PIR_KEYWORDS | nucleus                                                       | 37    | 43.0 | 1.9             | 2.70×10 <sup>-5</sup> | 8.44×10 <sup>-4</sup> |
| SP_PIR_KEYWORDS | rna-binding                                                   | 12    | 14.0 | 5.0             | 2.52×10 <sup>-5</sup> | 9.81×10 <sup>-4</sup> |
| GOTERM_BP_FAT   | GO:0010941~regulation of cell death                           | 17    | 19.8 | 3.9             | 4.43×10 <sup>-6</sup> | 0.001078              |
| SP_PIR_KEYWORDS | Apoptosis                                                     | 10    | 11.6 | 5.9             | 4.67×10 <sup>-5</sup> | 0.001212              |
| GOTERM_BP_FAT   | GO:0043067~regulation of programmed cell death                | 17    | 19.8 | 3.9             | 4.23×10 <sup>-6</sup> | 0.001371              |
| SP_PIR_KEYWORDS | cyclin                                                        | 5     | 5.8  | 22.4            | 7.00×10 <sup>-5</sup> | 0.00156               |
| GOTERM_BP_FAT   | GO:0010608~posttranscriptional regulation of gene expression  | 10    | 11.6 | 8.8             | 1.67×10 <sup>-6</sup> | 0.00163               |
| GOTERM_BP_FAT   | GO:0042981~regulation of apoptosis                            | 17    | 19.8 | 3.9             | 3.72×10 <sup>-6</sup> | 0.00181               |
| GOTERM_CC_FAT   | GO:0000307~cyclin-dependent protein kinase holoenzyme complex | 4     | 4.7  | 80.1            | 1.35×10 <sup>-5</sup> | 0.002054              |
| GOTERM_BP_FAT   | GO:0042127~regulation of cell proliferation                   | 16    | 18.6 | 3.8             | 1.33×10 <sup>-5</sup> | 0.002585              |
| SP_PIR_KEYWORDS | atp-binding                                                   | 17    | 19.8 | 2.9             | 2.01×10 <sup>-4</sup> | 0.003483              |
| GOTERM_BP_FAT   | GO:0010033~response to organic substance                      | 15    | 17.4 | 3.9             | 2.20×10 <sup>-5</sup> | 0.003569              |
| SP_PIR_KEYWORDS | cell cycle                                                    | 10    | 11.6 | 4.9             | 1.98×10 <sup>-4</sup> | 0.003857              |
| SP_PIR_KEYWORDS | cell cycle control                                            | 4     | 4.7  | 28.9            | 3.42×10 <sup>-4</sup> | 0.005327              |
| GOTERM_BP_FAT   | GO:0060548~negative regulation of cell death                  | 10    | 11.6 | 5.1             | 1.17×10 <sup>-4</sup> | 0.007128              |
| GOTERM_BP_FAT   | GO:0010942~positive regulation of cell death                  | 11    | 12.8 | 4.7             | 9.60×10 <sup>-5</sup> | 0.007165              |

| Category        | Term                                                                        | Count | %    | Fold Enrichment | P-Value               | Benjamini |
|-----------------|-----------------------------------------------------------------------------|-------|------|-----------------|-----------------------|-----------|
| GOTERM_BP_FAT   | GO:0043066~negative regulation of apoptosis                                 | 10    | 11.6 | 5.2             | 1.03×10 <sup>-4</sup> | 0.00717   |
| GOTERM_BP_FAT   | GO:0043069~negative regulation of programmed cell death                     | 10    | 11.6 | 5.2             | 1.15×10 <sup>-4</sup> | 0.007443  |
| GOTERM_BP_FAT   | GO:0043068~positive regulation of programmed cell death                     | 11    | 12.8 | 4.7             | 9.24×10 <sup>-5</sup> | 0.00747   |
| GOTERM_BP_FAT   | GO:0048008~platelet-derived growth factor receptor signaling pathway        | 4     | 4.7  | 39.0            | 1.32×10 <sup>-4</sup> | 0.007522  |
| GOTERM_BP_FAT   | GO:0043065~positive regulation of apoptosis                                 | 11    | 12.8 | 4.7             | 8.72×10 <sup>-5</sup> | 0.007693  |
| SP_PIR_KEYWORDS | Proto-oncogene                                                              | 7     | 8.1  | 6.8             | 5.45×10 <sup>-4</sup> | 0.007704  |
| GOTERM_BP_FAT   | GO:0012501~programmed cell death                                            | 13    | 15.1 | 3.9             | 8.27×10 <sup>-5</sup> | 0.008027  |
| GOTERM_BP_FAT   | GO:0010629~negative regulation of gene expression                           | 12    | 14.0 | 4.4             | 6.64×10 <sup>-5</sup> | 0.008052  |
| SP_PIR_KEYWORDS | ATP                                                                         | 7     | 8.1  | 6.6             | 6.24×10 <sup>-4</sup> | 0.008083  |
| GOTERM_BP_FAT   | GO:0007167~enzyme linked receptor protein signaling pathway                 | 10    | 11.6 | 5.4             | 7.95×10 <sup>-5</sup> | 0.008565  |
| GOTERM_BP_FAT   | GO:0008284~positive regulation of cell proliferation                        | 11    | 12.8 | 4.9             | 6.36×10 <sup>-5</sup> | 0.008811  |
| SP_PIR_KEYWORDS | kinase                                                                      | 11    | 12.8 | 3.6             | 8.95×10 <sup>-4</sup> | 0.009933  |
| SP_PIR_KEYWORDS | acetylation                                                                 | 24    | 27.9 | 2.0             | 8.38×10 <sup>-4</sup> | 0.010014  |
| GOTERM_BP_FAT   | GO:0000079~regulation of cyclin-dependent protein kinase activity           | 5     | 5.8  | 17.2            | 1.91×10 <sup>-4</sup> | 0.010271  |
| GOTERM_BP_FAT   | GO:0051329~interphase of mitotic cell cycle                                 | 6     | 7.0  | 10.8            | 2.17×10 <sup>-4</sup> | 0.011048  |
| SP_PIR_KEYWORDS | dna-binding                                                                 | 19    | 22.1 | 2.3             | 0.001165              | 0.011305  |
| SP_PIR_KEYWORDS | transcription regulation                                                    | 20    | 23.3 | 2.2             | 0.001147              | 0.011867  |
| GOTERM_BP_FAT   | GO:0051325~interphase                                                       | 6     | 7.0  | 10.5            | 2.48×10 <sup>-4</sup> | 0.011995  |
| SP_PIR_KEYWORDS | Transcription                                                               | 20    | 23.3 | 2.2             | 0.001489              | 0.012827  |
| SP_PIR_KEYWORDS | serine/threonine×10-protein kinase                                          | 8     | 9.3  | 4.7             | 0.001485              | 0.013547  |
| GOTERM_BP_FAT   | GO:0006915~apoptosis                                                        | 12    | 14.0 | 3.7             | 3.16×10 <sup>-4</sup> | 0.014535  |
| GOTERM_BP_FAT   | GO:0051252~regulation of RNA metabolic process                              | 22    | 25.6 | 2.2             | 3.46×10 <sup>-4</sup> | 0.015225  |
| GOTERM_BP_FAT   | GO:0008219~cell death                                                       | 13    | 15.1 | 3.4             | 3.76×10 <sup>-4</sup> | 0.015817  |
| GOTERM_BP_FAT   | GO:0016265~death                                                            | 13    | 15.1 | 3.3             | 4.01×10 <sup>-4</sup> | 0.016137  |
| BIOCARTA        | h_cellcyclePathway:Cyclins and Cell Cycle Regulation                        | 5     | 5.8  | 13.7            | 2.87×10 <sup>-4</sup> | 0.016217  |
| SP_PIR_KEYWORDS | activator                                                                   | 9     | 10.5 | 3.9             | 0.002102              | 0.017129  |
| SP_PIR_KEYWORDS | protein kinase inhibitor                                                    | 3     | 3.5  | 41.9            | 0.002225              | 0.017221  |
| GOTERM_BP_FAT   | GO:0010605~negative regulation of macromolecule metabolic process           | 13    | 15.1 | 3.3             | 4.54×10 <sup>-4</sup> | 0.017519  |
| SP_PIR_KEYWORDS | nucleotid×10-binding                                                        | 17    | 19.8 | 2.3             | 0.002665              | 0.019626  |
| GOTERM_BP_FAT   | GO:0050678~regulation of epithelial cell proliferation                      | 5     | 5.8  | 13.1            | 5.48×10 <sup>-4</sup> | 0.02031   |
| SP_PIR_KEYWORDS | isopeptide bond                                                             | 7     | 8.1  | 4.9             | 0.002897              | 0.02036   |
| SP_PIR_KEYWORDS | translation regulation                                                      | 4     | 4.7  | 13.4            | 0.003254              | 0.021864  |
| GOTERM_BP_FAT   | GO:0022402~cell cycle process                                               | 11    | 12.8 | 3.6             | 7.75×10 <sup>-4</sup> | 0.02486   |
| GOTERM_BP_FAT   | GO:0000278~mitotic cell cycle                                               | 9     | 10.5 | 4.5             | 7.55×10 <sup>-4</sup> | 0.025039  |
| GOTERM_BP_FAT   | GO:0009725~response to hormone stimulus                                     | 9     | 10.5 | 4.5             | 7.16×10 <sup>-4</sup> | 0.025497  |
| GOTERM_BP_FAT   | GO:0007049~cell cycle                                                       | 13    | 15.1 | 3.1             | 7.44×10 <sup>-4</sup> | 0.025569  |
| GOTERM_CC_FAT   | GO:0031981~nuclear lumen                                                    | 17    | 19.8 | 2.6             | 4.31×10 <sup>-4</sup> | 0.032249  |
| GOTERM_BP_FAT   | GO:0007169~transmembrane receptor protein tyrosine kinase signaling pathway | 7     | 8.1  | 5.8             | 0.001212              | 0.037377  |
| SP_PIR_KEYWORDS | rna-mediated gene silencing                                                 | 3     | 3.5  | 24.9            | 0.006305              | 0.038699  |
| GOTERM_BP_FAT   | GO:0045449~regulation of transcription                                      | 26    | 30.2 | 1.9             | 0.001389              | 0.040185  |
| SP_PIR_KEYWORDS | cell division                                                               | 6     | 7.0  | 5.1             | 0.006305              | 0.040278  |
| GOTERM_BP_FAT   | GO:0009719~response to endogenous stimulus                                  | 9     | 10.5 | 4.1             | 0.001351              | 0.0403    |
| GOTERM_CC_FAT   | GO:0031974~membran×10-enclosed lumen                                        | 19    | 22.1 | 2.3             | 8.24×10 <sup>-4</sup> | 0.040899  |
| GOTERM_BP_FAT   | GO:0012502~induction of programmed cell death                               | 8     | 9.3  | 4.6             | 0.00156               | 0.041362  |
| GOTERM_MF_FAT   | GO:0019899~enzyme binding                                                   | 11    | 12.8 | 4.0             | 3.66×10 <sup>-4</sup> | 0.041436  |
| GOTERM_BP_FAT   | GO:0022403~cell cycle phase                                                 | 9     | 10.5 | 4.0             | 0.001552              | 0.042316  |
| GOTERM_BP_FAT   | GO:0006917~induction of apoptosis                                           | 8     | 9.3  | 4.6             | 0.001532              | 0.042984  |
| GOTERM_BP_FAT   | GO:0010604~positive regulation of macromolecule metabolic process           | 13    | 15.1 | 2.8             | 0.001754              | 0.045158  |
| GOTERM_BP_FAT   | GO:0030324~lung development                                                 | 5     | 5.8  | 9.4             | 0.001897              | 0.045184  |
| GOTERM_BP_FAT   | GO:0051726~regulation of cell cycle                                         | 8     | 9.3  | 4.5             | 0.001858              | 0.045383  |
| GOTERM_BP_FAT   | GO:0006355~regulation of transcription, DNA-dependent                       | 20    | 23.3 | 2.1             | 0.001853              | 0.046432  |
| SP_PIR_KEYWORDS | chromosomal rearrangement                                                   | 6     | 7.0  | 4.8             | 0.007913              | 0.04655   |
| GOTERM_BP_FAT   | GO:0030323~respiratory tube development                                     | 5     | 5.8  | 9.1             | 0.002116              | 0.049078  |

**Supplementary Table 3 | Top five clusters of categories (terms) overrepresented in the list of genes with the highest in-degree in the F-network.**

| <b>Annotation Cluster 1</b> |                                          | <b>Enrichment Score: 4.76</b> |          |                        |                       |                       |
|-----------------------------|------------------------------------------|-------------------------------|----------|------------------------|-----------------------|-----------------------|
| <b>Category</b>             | <b>Term</b>                              | <b>Count</b>                  | <b>%</b> | <b>Fold Enrichment</b> | <b>P-Value</b>        | <b>Benjamini</b>      |
| GOTERM_CC_FAT               | GO:0031981~nuclear lumen                 | 29                            | 21.3     | 2.7                    | $7.77 \times 10^{-7}$ | $1.83 \times 10^{-4}$ |
| GOTERM_CC_FAT               | GO:0031974~membrane-enclosed lumen       | 32                            | 23.5     | 2.3                    | $3.76 \times 10^{-6}$ | $2.95 \times 10^{-4}$ |
| GOTERM_CC_FAT               | GO:0043233~organelle lumen               | 31                            | 22.8     | 2.3                    | $7.57 \times 10^{-6}$ | $4.47 \times 10^{-4}$ |
| GOTERM_CC_FAT               | GO:0070013~intracellular organelle lumen | 30                            | 22.1     | 2.3                    | $1.43 \times 10^{-5}$ | $6.73 \times 10^{-4}$ |
| GOTERM_CC_FAT               | GO:0005654~nucleoplasm                   | 19                            | 14.0     | 2.9                    | $5.56 \times 10^{-5}$ | 0.002185              |
| GOTERM_CC_FAT               | GO:0005730~nucleolus                     | 14                            | 10.3     | 2.7                    | 0.001567              | 0.051489              |

  

| <b>Annotation Cluster 2</b> |                                                         | <b>Enrichment Score: 4.55</b> |          |                        |                       |                       |
|-----------------------------|---------------------------------------------------------|-------------------------------|----------|------------------------|-----------------------|-----------------------|
| <b>Category</b>             | <b>Term</b>                                             | <b>Count</b>                  | <b>%</b> | <b>Fold Enrichment</b> | <b>PValue</b>         | <b>Benjamini</b>      |
| GOTERM_BP_FAT               | GO:0042981~regulation of apoptosis                      | 24                            | 17.6     | 3.5                    | $1.93 \times 10^{-7}$ | $1.32 \times 10^{-4}$ |
| GOTERM_BP_FAT               | GO:0043067~regulation of programmed cell death          | 24                            | 17.6     | 3.5                    | $2.31 \times 10^{-7}$ | $1.05 \times 10^{-4}$ |
| GOTERM_BP_FAT               | GO:0010941~regulation of cell death                     | 24                            | 17.6     | 3.5                    | $2.46 \times 10^{-7}$ | $8.42 \times 10^{-5}$ |
| GOTERM_BP_FAT               | GO:0043065~positive regulation of apoptosis             | 15                            | 11.0     | 4.1                    | $1.50 \times 10^{-5}$ | 0.002274              |
| GOTERM_BP_FAT               | GO:0043068~positive regulation of programmed cell death | 15                            | 11.0     | 4.1                    | $1.62 \times 10^{-5}$ | 0.002011              |
| GOTERM_BP_FAT               | GO:0010942~positive regulation of cell death            | 15                            | 11.0     | 4.1                    | $1.70 \times 10^{-5}$ | 0.001792              |
| GOTERM_BP_FAT               | GO:0043066~negative regulation of apoptosis             | 13                            | 9.6      | 4.3                    | $4.30 \times 10^{-5}$ | 0.003671              |
| GOTERM_BP_FAT               | GO:0043069~negative regulation of programmed cell death | 13                            | 9.6      | 4.3                    | $4.93 \times 10^{-5}$ | 0.003957              |
| GOTERM_BP_FAT               | GO:0060548~negative regulation of cell death            | 13                            | 9.6      | 4.2                    | $5.06 \times 10^{-5}$ | 0.003839              |
| SP_PIR_KEYWORDS             | Apoptosis                                               | 12                            | 8.8      | 4.5                    | $7.96 \times 10^{-5}$ | 0.00117               |
| GOTERM_BP_FAT               | GO:0006917~induction of apoptosis                       | 12                            | 8.8      | 4.4                    | $8.04 \times 10^{-5}$ | 0.005486              |
| GOTERM_BP_FAT               | GO:0012502~induction of programmed cell death           | 12                            | 8.8      | 4.4                    | $8.27 \times 10^{-5}$ | 0.005129              |
| GOTERM_BP_FAT               | GO:0008219~cell death                                   | 18                            | 13.2     | 2.9                    | $1.05 \times 10^{-4}$ | 0.00594               |
| GOTERM_BP_FAT               | GO:0016265~death                                        | 18                            | 13.2     | 2.9                    | $1.14 \times 10^{-4}$ | 0.005744              |
| GOTERM_BP_FAT               | GO:0012501~programmed cell death                        | 16                            | 11.8     | 3.1                    | $1.84 \times 10^{-4}$ | 0.008655              |
| GOTERM_BP_FAT               | GO:0006915~apoptosis                                    | 15                            | 11.0     | 2.9                    | $5.28 \times 10^{-4}$ | 0.019335              |
| GOTERM_BP_FAT               | GO:0006916~anti-apoptosis                               | 8                             | 5.9      | 4.6                    | 0.001785              | 0.041964              |

  

| <b>Annotation Cluster 3</b> |                                                              | <b>Enrichment Score: 4.17</b> |          |                        |                       |                       |
|-----------------------------|--------------------------------------------------------------|-------------------------------|----------|------------------------|-----------------------|-----------------------|
| <b>Category</b>             | <b>Term</b>                                                  | <b>Count</b>                  | <b>%</b> | <b>Fold Enrichment</b> | <b>PValue</b>         | <b>Benjamini</b>      |
| GOTERM_BP_FAT               | GO:0010608~posttranscriptional regulation of gene expression | 14                            | 10.3     | 7.8                    | $2.42 \times 10^{-8}$ | $3.32 \times 10^{-5}$ |
| GOTERM_BP_FAT               | GO:0032268~regulation of cellular protein metabolic process  | 13                            | 9.6      | 3.2                    | $6.44 \times 10^{-4}$ | 0.021802              |
| GOTERM_BP_FAT               | GO:0006417~regulation of translation                         | 7                             | 5.1      | 6.0                    | 0.001054              | 0.029596              |
| SP_PIR_KEYWORDS             | translation regulation                                       | 5                             | 3.7      | 10.6                   | 0.001263              | 0.011767              |

  

| <b>Annotation Cluster 4</b> |                                                | <b>Enrichment Score: 4.06</b> |          |                        |                       |                       |
|-----------------------------|------------------------------------------------|-------------------------------|----------|------------------------|-----------------------|-----------------------|
| <b>Category</b>             | <b>Term</b>                                    | <b>Count</b>                  | <b>%</b> | <b>Fold Enrichment</b> | <b>PValue</b>         | <b>Benjamini</b>      |
| SP_PIR_KEYWORDS             | rna-binding                                    | 21                            | 15.4     | 5.5                    | $1.23 \times 10^{-9}$ | $1.27 \times 10^{-7}$ |
| GOTERM_MF_FAT               | GO:0003723~RNA binding                         | 22                            | 16.2     | 3.4                    | $1.13 \times 10^{-6}$ | $3.42 \times 10^{-4}$ |
| INTERPRO                    | IPR012677:Nucleotide-binding, alpha-beta plait | 11                            | 8.1      | 6.6                    | $6.63 \times 10^{-6}$ | 0.001914              |
| INTERPRO                    | IPR000504:RNA recognition motif, RNP-1         | 10                            | 7.4      | 6.0                    | $4.15 \times 10^{-5}$ | 0.005973              |
| SMART                       | SM00360:RRM                                    | 10                            | 7.4      | 4.5                    | $3.21 \times 10^{-4}$ | 0.026592              |
| UP_SEQ_FEATURE              | domain:RRM                                     | 6                             | 4.4      | 7.1                    | 0.001566              | 0.13857               |
| UP_SEQ_FEATURE              | domain:RRM 2                                   | 5                             | 3.7      | 7.0                    | 0.00573               | 0.279738              |
| UP_SEQ_FEATURE              | domain:RRM 1                                   | 5                             | 3.7      | 7.0                    | 0.00573               | 0.279738              |
| UP_SEQ_FEATURE              | domain:RRM 3                                   | 3                             | 2.2      | 8.4                    | 0.04867               | 0.794592              |

  

| <b>Annotation Cluster 5</b> |                                                                             | <b>Enrichment Score: 3.61</b> |          |                        |                       |                  |
|-----------------------------|-----------------------------------------------------------------------------|-------------------------------|----------|------------------------|-----------------------|------------------|
| <b>Category</b>             | <b>Term</b>                                                                 | <b>Count</b>                  | <b>%</b> | <b>Fold Enrichment</b> | <b>PValue</b>         | <b>Benjamini</b> |
| GOTERM_BP_FAT               | GO:0007167~enzyme linked receptor protein signaling pathway                 | 14                            | 10.3     | 4.8                    | $5.97 \times 10^{-6}$ | 0.001165         |
| GOTERM_BP_FAT               | GO:0048008~platelet-derived growth factor receptor signaling pathway        | 5                             | 3.7      | 31.0                   | $1.68 \times 10^{-5}$ | 0.001915         |
| GOTERM_BP_FAT               | GO:0007169~transmembrane receptor protein tyrosine kinase signaling pathway | 9                             | 6.6      | 4.7                    | $6.09 \times 10^{-4}$ | 0.021154         |
| GOTERM_BP_FAT               | GO:0007166~cell surface receptor linked signal transduction                 | 23                            | 16.9     | 1.5                    | 0.059357              | 0.43637          |

**Supplementary Table 4 | Top three clusters of categories (terms) overrepresented in the list of genes with the highest in-degree in the IS-network.**

| Annotation Cluster 1 |                                                         | Enrichment Score: 3.89 |      |                 |                       |           |
|----------------------|---------------------------------------------------------|------------------------|------|-----------------|-----------------------|-----------|
| Category             | Term                                                    | Count                  | %    | Fold Enrichment | P-Value               | Benjamini |
| GOTERM_BP_FAT        | GO:0042981~regulation of apoptosis                      | 17                     | 19.8 | 3.9             | $3.72 \times 10^{-6}$ | 0.00181   |
| GOTERM_BP_FAT        | GO:0043067~regulation of programmed cell death          | 17                     | 19.8 | 3.9             | $4.23 \times 10^{-6}$ | 0.001371  |
| GOTERM_BP_FAT        | GO:0010941~regulation of cell death                     | 17                     | 19.8 | 3.9             | $4.43 \times 10^{-6}$ | 0.001078  |
| SP_PIR_KEYWORDS      | Apoptosis                                               | 10                     | 11.6 | 5.9             | $4.67 \times 10^{-5}$ | 0.001212  |
| GOTERM_BP_FAT        | GO:0012501~programmed cell death                        | 13                     | 15.1 | 3.9             | $8.27 \times 10^{-5}$ | 0.008027  |
| GOTERM_BP_FAT        | GO:0043065~positive regulation of apoptosis             | 11                     | 12.8 | 4.7             | $8.72 \times 10^{-5}$ | 0.007693  |
| GOTERM_BP_FAT        | GO:0043068~positive regulation of programmed cell death | 11                     | 12.8 | 4.7             | $9.24 \times 10^{-5}$ | 0.00747   |
| GOTERM_BP_FAT        | GO:0010942~positive regulation of cell death            | 11                     | 12.8 | 4.7             | $9.60 \times 10^{-5}$ | 0.007165  |
| GOTERM_BP_FAT        | GO:0043066~negative regulation of apoptosis             | 10                     | 11.6 | 5.2             | $1.03 \times 10^{-4}$ | 0.00717   |
| GOTERM_BP_FAT        | GO:0043069~negative regulation of programmed cell death | 10                     | 11.6 | 5.2             | $1.15 \times 10^{-4}$ | 0.007443  |
| GOTERM_BP_FAT        | GO:0060548~negative regulation of cell death            | 10                     | 11.6 | 5.1             | $1.17 \times 10^{-4}$ | 0.007128  |
| GOTERM_BP_FAT        | GO:0006915~apoptosis                                    | 12                     | 14.0 | 3.7             | $3.16 \times 10^{-4}$ | 0.014535  |
| GOTERM_BP_FAT        | GO:0008219~cell death                                   | 13                     | 15.1 | 3.4             | $3.76 \times 10^{-4}$ | 0.015817  |
| GOTERM_BP_FAT        | GO:0016265~death                                        | 13                     | 15.1 | 3.3             | $4.01 \times 10^{-4}$ | 0.016137  |
| GOTERM_BP_FAT        | GO:0006917~induction of apoptosis                       | 8                      | 9.3  | 4.6             | 0.001532              | 0.042984  |
| GOTERM_BP_FAT        | GO:0012502~induction of programmed cell death           | 8                      | 9.3  | 4.6             | 0.00156               | 0.041362  |
| GOTERM_BP_FAT        | GO:0006916~anti-apoptosis                               | 5                      | 5.8  | 4.5             | 0.024044              | 0.238507  |

  

| Annotation Cluster 2 |                                                              | Enrichment Score: 3.04 |      |                 |                       |           |
|----------------------|--------------------------------------------------------------|------------------------|------|-----------------|-----------------------|-----------|
| Category             | Term                                                         | Count                  | %    | Fold Enrichment | P-Value               | Benjamini |
| GOTERM_BP_FAT        | GO:0010608~posttranscriptional regulation of gene expression | 10                     | 11.6 | 8.8             | $1.67 \times 10^{-6}$ | 0.00163   |
| SP_PIR_KEYWORDS      | translation regulation                                       | 4                      | 4.7  | 13.4            | 0.003254              | 0.021864  |
| GOTERM_BP_FAT        | GO:0032268~regulation of cellular protein metabolic process  | 9                      | 10.5 | 3.5             | 0.00359               | 0.06514   |
| GOTERM_BP_FAT        | GO:0006417~regulation of translation                         | 4                      | 4.7  | 5.4             | 0.036521              | 0.30398   |

  

| Annotation Cluster 3 |                                                                             | Enrichment Score: 2.96 |      |                 |                       |           |
|----------------------|-----------------------------------------------------------------------------|------------------------|------|-----------------|-----------------------|-----------|
| Category             | Term                                                                        | Count                  | %    | Fold Enrichment | P-Value               | Benjamini |
| GOTERM_BP_FAT        | GO:0007167~enzyme linked receptor protein signaling pathway                 | 10                     | 11.6 | 5.4             | $7.95 \times 10^{-5}$ | 0.008565  |
| GOTERM_BP_FAT        | GO:0048008~platelet-derived growth factor receptor signaling pathway        | 4                      | 4.7  | 39.0            | $1.32 \times 10^{-4}$ | 0.007522  |
| GOTERM_BP_FAT        | GO:0007169~transmembrane receptor protein tyrosine kinase signaling pathway | 7                      | 8.1  | 5.8             | 0.001212              | 0.037377  |
| GOTERM_BP_FAT        | GO:0007166~cell surface receptor linked signal transduction                 | 15                     | 17.4 | 1.5             | 0.109849              | 0.568095  |

### *Three-node sub-networks*

In total there exists sixteen non-equivalent (i.e., non-isomorphic) directed three-node sub-networks. All of them are shown in Supplementary Fig. 2. Three of these sub-networks are disconnected, and thirteen are connected. For all connected sub-networks we summarized data on their occurrence in random graphs as well as in the constructed F-network and IS-network in Supplementary Table 5.

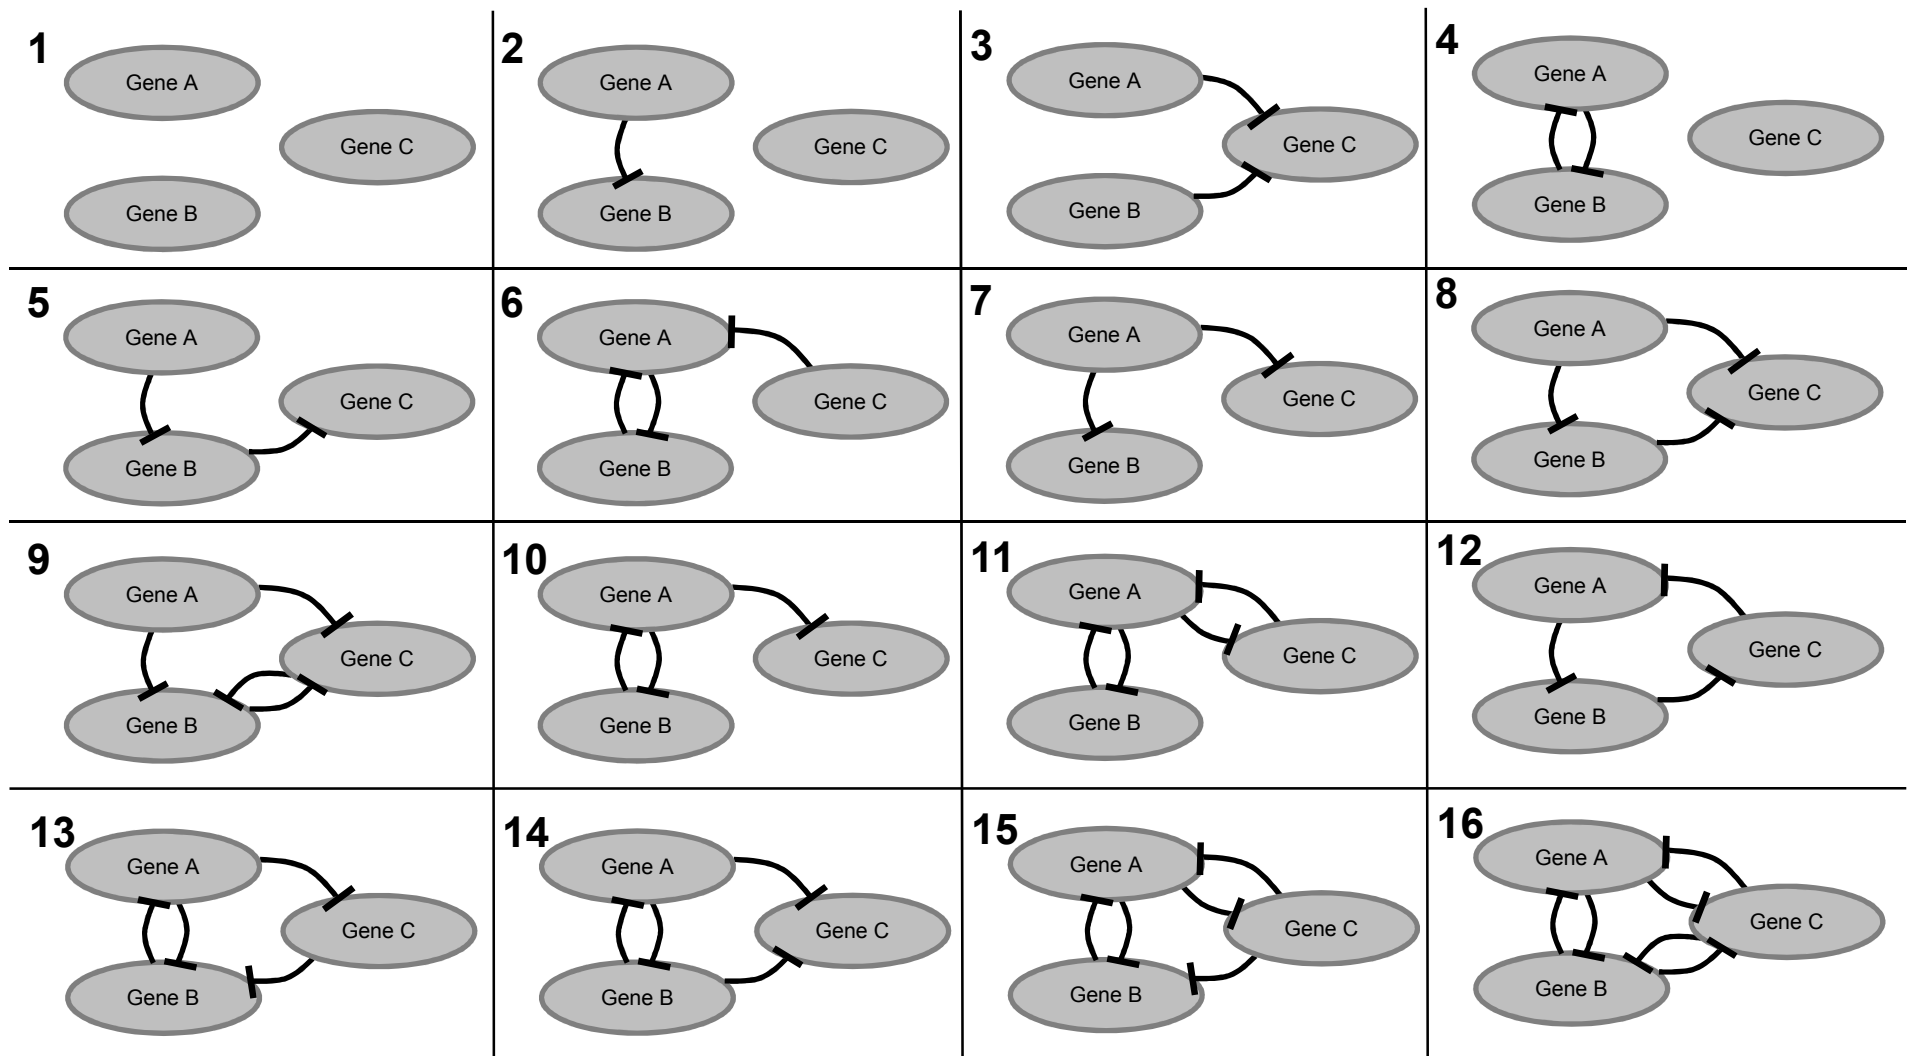

**Supplementary Figure 2 | All non-equivalent (i.e., non-isomorphic) directed three-node sub-networks.** Sub-networks 1, 2, 4 are disconnected, all other sub-networks are connected.



**Supplementary Table 5 | Aggregate information on number of connected three-node sub-networks of each type in the F- and IS-networks and in generated random graphs.** Sub-network types are given in accordance with Supplementary Fig. 2. For random graphs interquartile intervals [Q1, Q3] for numbers of sub-networks are specified. If an observed number of a sub-network does not belong to the interquartile interval, the conventional estimate of the p-value<sup>1</sup> is additionally presented below the interquartile interval.

| Type | IS-network |                                     |                                     | F-network |                                     |                                     |
|------|------------|-------------------------------------|-------------------------------------|-----------|-------------------------------------|-------------------------------------|
|      | Observed   | Erdős–Rényi                         | Fixed out-degree                    | Observed  | Erdős–Rényi                         | Fixed out-degree                    |
| 3    | 22913      | [17109, 17282]<br><10 <sup>-4</sup> | [12907, 13610]<br><10 <sup>-4</sup> | 30757     | [21178, 21374]<br><10 <sup>-4</sup> | [16479, 17208]<br><10 <sup>-4</sup> |
| 5    | 24917      | [34268, 34521]<br><10 <sup>-4</sup> | [23734, 29111]                      | 32654     | [42418, 42695]<br><10 <sup>-4</sup> | [30554, 36626]                      |
| 6    | 18         | [4, 12]<br>0.10                     | [2, 8]<br>0.017                     | 41        | [5, 16]<br>0.0026                   | [3, 11]<br><10 <sup>-4</sup>        |
| 7    | 7293634    | [17110, 17286]<br><10 <sup>-4</sup> | [7289687, 7293494]<br>0.23          | 7732631   | [21182, 21377]<br><10 <sup>-4</sup> | [7732075, 7736051]                  |
| 8    | 1948       | [6, 10]<br><10 <sup>-4</sup>        | [2587, 3269]<br>0.016               | 2448      | [9, 13]<br><10 <sup>-4</sup>        | [3049, 3739]<br>0.025               |
| 9    | 0          | [0, 0]                              | [0, 0]                              | 0         | [0, 0]                              | [0, 1]                              |
| 10   | 1773       | [4, 12]<br><10 <sup>-4</sup>        | [928, 4389]                         | 5333      | [5, 16]<br><10 <sup>-4</sup>        | [1341, 4969]<br>0.22                |
| 11   | 0          | [0, 0]                              | [0, 0]                              | 2         | [0, 0]<br><10 <sup>-4</sup>         | [0, 1]<br>0.067                     |
| 12   | 0          | [2, 4]<br>0.065                     | [1, 3]<br>0.21                      | 0         | [2, 5]<br>0.025                     | [1, 4]<br>0.12                      |
| 13   | 0          | [0, 0]                              | [0, 1]                              | 2         | [0, 0]<br><10 <sup>-4</sup>         | [0, 1]<br>0.18                      |
| 14   | 53         | [0, 0]<br><10 <sup>-4</sup>         | [7, 216]                            | 248       | [0, 0]<br><10 <sup>-4</sup>         | [16, 228]<br>0.22                   |
| 15   | 0          | [0, 0]                              | [0, 0]                              | 0         | [0, 0]                              | [0, 0]                              |
| 16   | 0          | [0, 0]                              | [0, 0]                              | 0         | [0, 0]                              | [0, 0]                              |

### Histograms supporting p-values

Histograms supporting specified p-values associated with the three-node network motif depicted in Fig. 2a (sub-network type 6 in accordance with Supplementary Fig. 2) are presented in Supplementary Fig. 3.

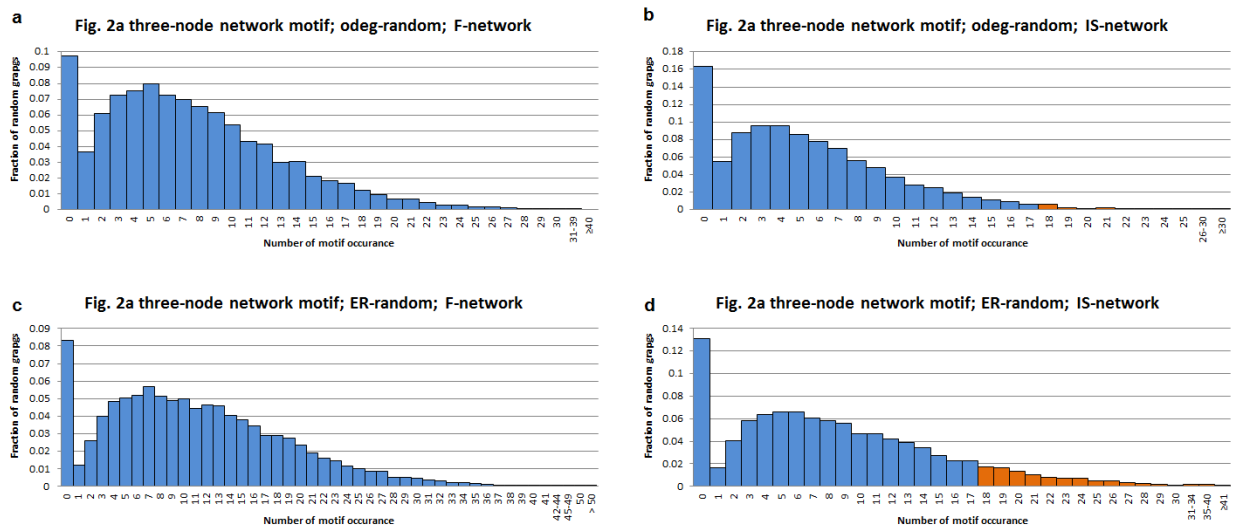

**Supplementary Figure 3 | Histograms supporting specified p-values associated with the network motif shown in Fig. 2a (sub-network type 6 in accordance with Supplementary Fig. 2).** Bars for which the value is equal to or greater than the number of occurrence observed in the constructed networks (i.e., bars contributing to p-value) are colored in orange. Panels **a**, **b** correspond to the model of random graph generation with the fixed out-degrees, and panels **c**, **d** correspond to the Erdős–Rényi model. Panels **a**, **c** correspond to the F-network, and panels **b**, **d** correspond to the IS-network.

For the network motif depicted in Fig. 2b (sub-network type 14 in accordance with Supplementary Fig. 2) in case of the F-network the Erdős–Rényi model generated 9,983 random graphs with no occurrence of this sub-network and 17 random graphs with one occurrence; no graphs with at least two occurrences were generated. The numbers for the IS-network were similar (9,988 and 12; no graphs with at least two occurrences).

For the network motif depicted in Fig. 2c (sub-network type 3 in accordance with Supplementary Fig. 2) the number of occurrence was 30,757 for the F-network and 22,913 for the IS-network (see Supplementary Table 5). These numbers exceed the number of occurrence in all generated random graphs. For the Erdős–Rényi model histograms for random graphs are presented in Supplementary Fig. 4. For the model with the fixed out-degrees the difference was even more striking (maximum observed numbers of occurrence in random graphs were 18,568 and 14,846 for the F-network and for the IS-network, respectively).

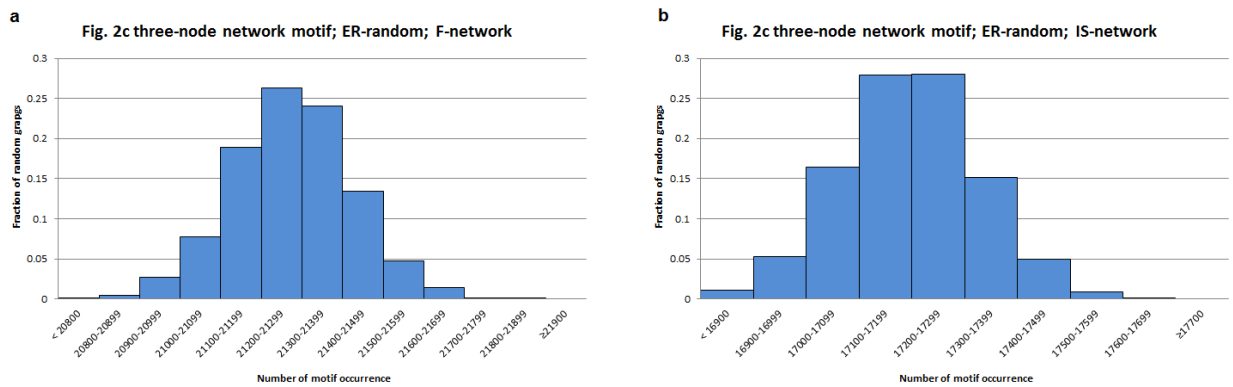

**Supplementary Figure 4 | Histograms supporting specified p-values associated with the network motif shown in Fig. 2c (sub-network type 3 in accordance with Supplementary Fig. 2) for the Erdős–Rényi model. Panel a corresponds to the F-network, and panel b corresponds to the IS-network.**

In case of the Erdős–Rényi model random graph core size exceeded 5,000 for all the generated graphs (both for the F-network and the IS-network). Histograms for the core size of random graphs generated by the model with the fixed out-degrees are presented in Supplementary Fig. 5.

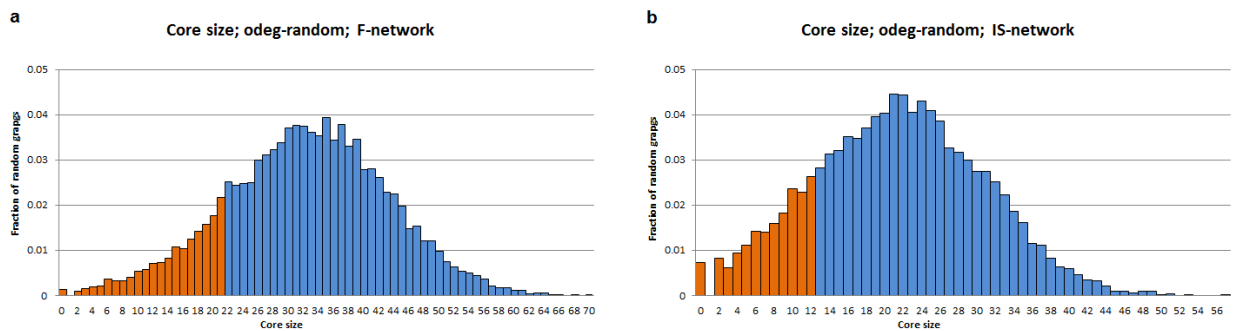

**Supplementary Figure 5 | Histograms supporting specified p-values associated with the network core size (the model with the fixed out-degrees). Panel a corresponds to the F-network, and panel b corresponds to the IS-network. Bars for which the value is equal to or less than the core size in the constructed networks (i.e., bars contributing to p-value) are colored in orange.**

### The core of the F-network

Genes forming the core of the F-network and intergenic interaction between these genes induced by the intragenic miRNAs are presented in Supplementary Fig. 6.

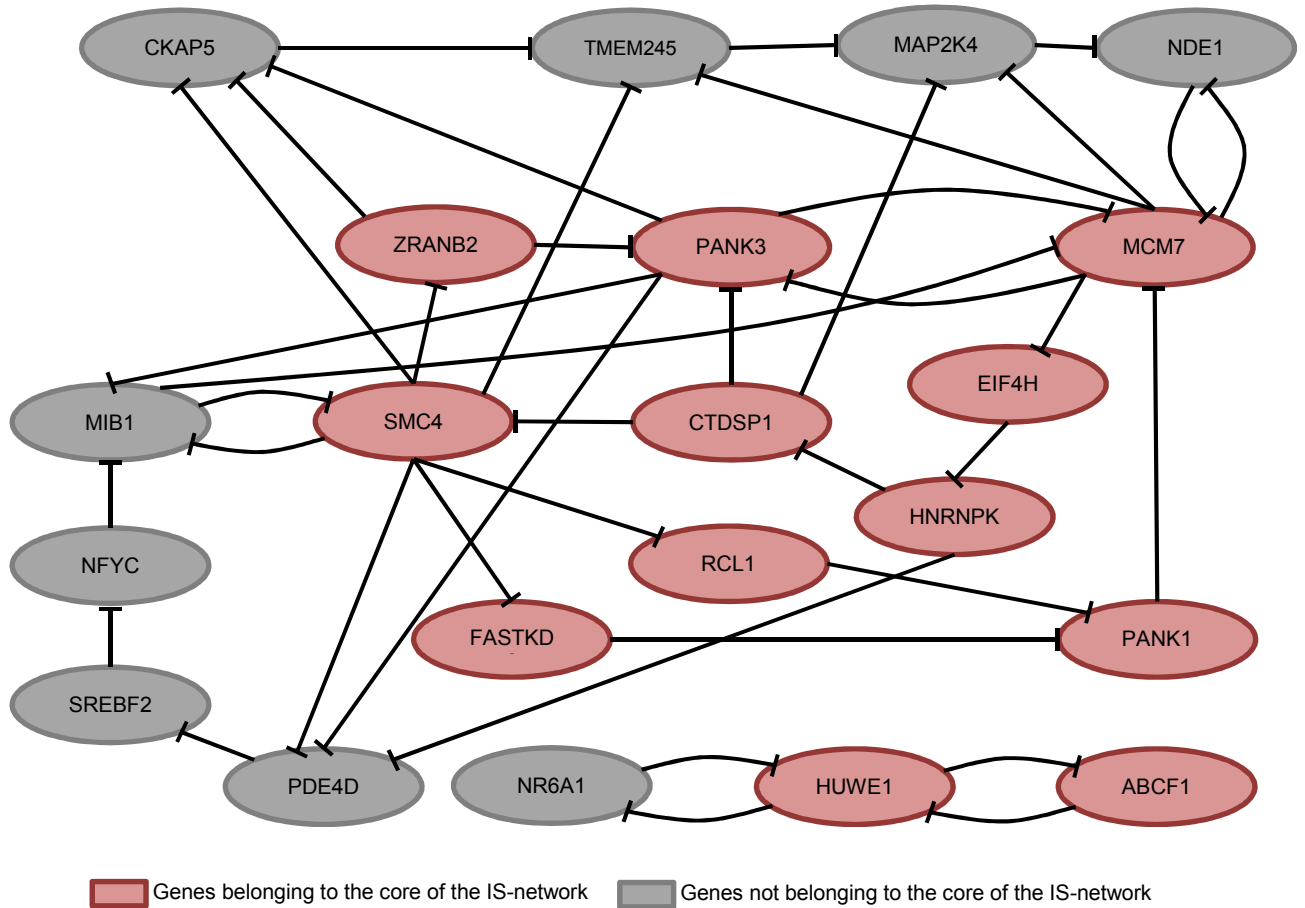

**Supplementary Figure 6 | The core of the F-network.** The nodes are genes, and the nodes (genes)  $A$  and  $B$  are connected by a directed edge ( $A \rightarrow B$ ) if gene  $A$  hosts a miRNA that targets gene  $B$ .

### Boxplots for the expression levels of genes in the collection of cell lines

For the analyzed collection of 675 cell lines, boxplots illustrating the data on higher expression levels and lower expression variance of genes comprising the network core (compared to the median values) are presented in Supplementary Fig. 7, 8.

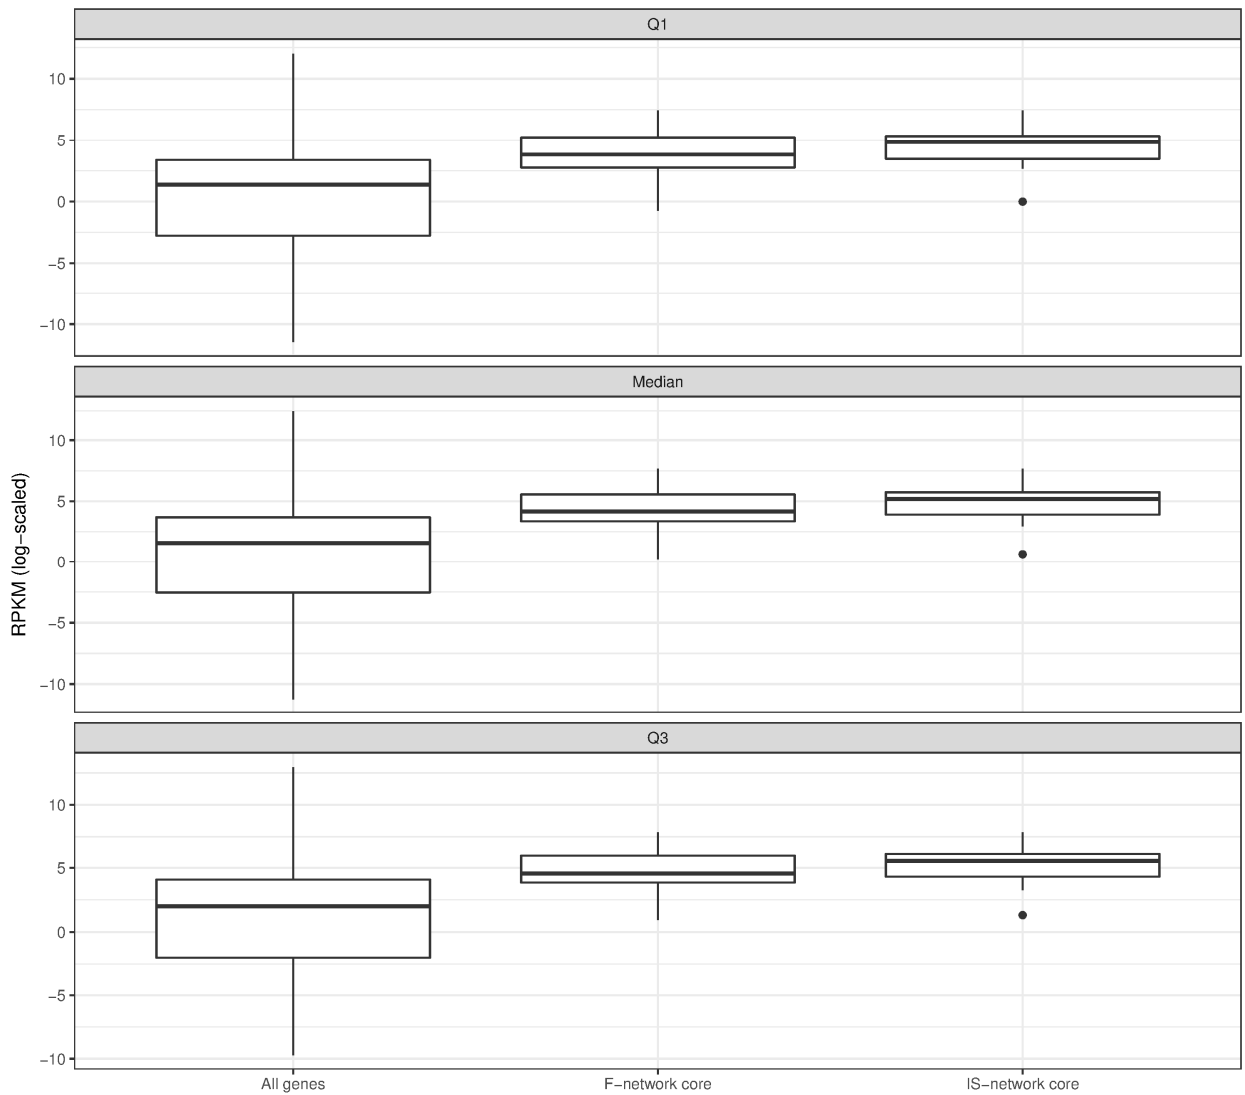

**Supplementary Figure 7 | Boxplots for expression levels.** Boxplots are shown for the complete set of genes (ca. 26 thousand), for the genes comprising the core of the F-network, and for the genes comprising the core of the IS-network. The data is presented for the lower quartile (Q1), median, and upper quartile (Q3) of expression levels (RPKM) in the collection of cell lines.

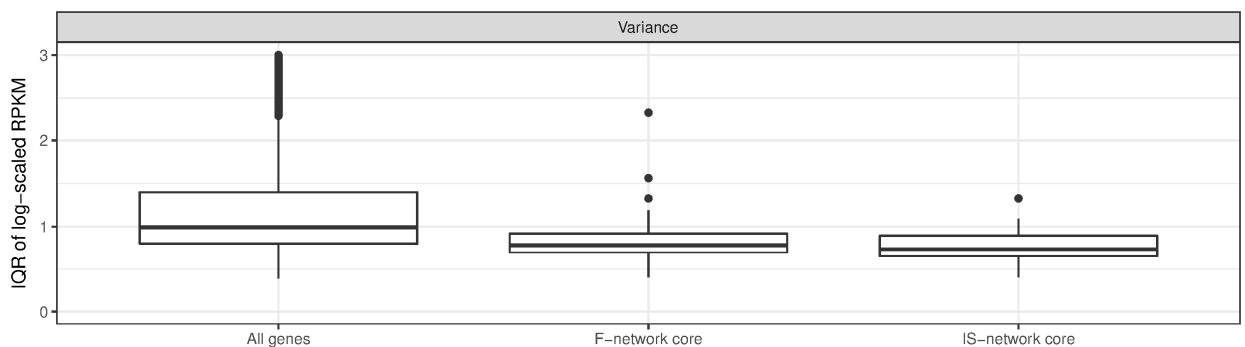

**Supplementary Figure 8 | Boxplots for expression variance.** Boxplots are shown for the complete set of genes (ca. 26 thousand), for the genes comprising the core of the F-network, and for the genes comprising the core of the IS-network. To increase readability, we set maximum value for the Y axis to three, cutting outliers for the complete set of genes (the outliers have IQR of  $\log_2$ -scaled RPKM up to 10.6).

### ***Expression levels of core genes in tissue specimens***

Analysis of expression levels of core genes in tissue specimens obtained from breast and colorectal cancer patients utilized the microarray series used as training datasets for construction of prognostic gene signatures: GSE17705 for breast cancer patients and GSE39582 for colorectal cancer patients. The series were analyzed separately. Probesets with no associated Gene Symbols were excluded from the analysis. If multiple probesets were associated with the same gene, only the one with the highest median expression level was retained. The Affymetrix Human Genome U133 Plus 2.0 Array that was used for gene expression profiling in GSE39582 series contained probesets for all core genes. The Affymetrix Human Genome U133A Array that was used in GSE17705 series contained probesets for 17 out of 21 genes comprising the core of the F-network, including 10 out of 12 genes comprising the core of the IS-network.

Ranking of genes by median expression level, as well as by the third (higher) or by the first (lower) quartile, demonstrated that core genes have high or at least medium expression levels. All genes comprising the core of the IS-network belonged to the upper half of the ranking (binomial test p-value  $9.8 \times 10^{-4}$  and  $2.4 \times 10^{-4}$  for the breast cancer patients and colorectal cancer patients, respectively). Moreover, in the case of colorectal cancer, 11 out of 12 genes (or even all 12 genes for ranking by the first quartile) belonged to the upper quarter (binomial test p-value  $2.2 \times 10^{-6}$ ). In the case of breast cancer, 6 out of 10 IS-core genes with known expression levels belonged to the upper quarter (binomial test p-value 0.020). Similarly, in the core of the F-network, all the genes except one — *PDE4D* for breast cancer and *NR6A1* for colorectal cancer — belonged to the upper half of gene ranking by median expression level, as well as by the first or the third quartile (binomial test p-value  $1.4 \times 10^{-4}$  and  $1.0 \times 10^{-5}$  for breast and colorectal tissue specimens, respectively). Although expression levels for different genes cannot be directly compared in case of microarray expression quantification, these data strongly indicate that the core genes were generally highly expressed in the analyzed tissue specimens.

Analysis of expression variances, quantified as the third quartile to the first quartile ratio of expression levels in linear scale, demonstrated that the core genes tended to have lower variance in comparison to the median values. Note that with respect to ranking, this quantification of expression variance is equivalent to the interquartile range of log-scaled expression levels. To exclude the influence of non-expressed and poorly expressed genes on the analysis results, we focused only on genes from the upper half of genes ranking by the first quartile of expression levels. These genes were ranked by expression variances, and the enrichment of the network cores by the genes from the upper quarter of this ranking was assessed. For the colorectal cancer tissue specimens, the statistical significance of the enrichment was slightly violated (binomial test p-value 0.054 and 0.10 for the core of the IS-network and the core of the F-network, respectively). At the same time, for the breast cancer tissue specimens, the enrichment was statistically significant (binomial test p-value 0.020 and 0.027 for the IS-network and for the F-network, respectively). Moreover, in case of breast cancer, only two and four genes from the core of the IS-network and the F-network, respectively, did not belong to the upper half of the ranking by expression variance.

### ***Datasets utilized for construction of prognostic gene signatures for colorectal cancer patients***

Datasets utilized for construction of prognostic gene signatures for colorectal cancer patients are presented in Supplementary Table 6.

**Supplementary Table 6 | Datasets utilized for construction of prognostic gene signatures for colorectal cancer patients.**

| Dataset accession | Dataset type | Patients |                           |                                                 |
|-------------------|--------------|----------|---------------------------|-------------------------------------------------|
|                   |              | Total    | Recurrence within 3 years | No recurrence and follow-up of at least 4 years |
| GSE39582          | Training     | 519      | 124                       | 245                                             |
| GSE37892          | Filtration   | 129      | 32                        | 48                                              |
| GSE17536          | Filtration   | 144      | 31                        | 58                                              |
| GSE14333          | Validation   | 225      | 41                        | 85                                              |

### ***Prognostic gene triples***

The classifiers based on the identified triples of genes from the core of the constructed network had the following parameters.

For the triple *HNRNPK*, *PANK3*, *SMC4* weights  $w$  were  $-0.142$ ,  $-0.496$  and  $1.219$ , respectively, and the value of  $\rho$  was  $-0.193$ .

For the triple *MCM7*, *PANK3*, *SMC4* weights  $w$  were  $0.061$ ,  $-0.457$  and  $1.101$ , respectively, and the value of  $\rho$  was  $-0.169$ .

For the triple *MAP2K4*, *PANK3*, *SMC4* weights  $w$  were  $-0.452$ ,  $-0.402$  and  $1.030$ , respectively, and the value of  $\rho$  was  $-0.141$ .

For the triple *FASTKD2*, *PANK1*, *HUWE1* weights  $w$  were  $-0.623$ ,  $-0.417$  and  $0.282$ , respectively, and the value of  $\rho$  was  $-0.044$ .

For breast cancer, among 680 considered triples of genes from the core of the F-network, 250 passed thresholds on sensitivity and specificity for the training dataset. The first filtration dataset kept 163 triples, and finally after the filtration based on the second filtration dataset 17 triples remained. Out of these 17 triples, four included genes only from the core of the IS-network.

For colorectal cancer, among 1330 considered triples of genes from the core of the F-network, 194 triples satisfied the thresholds for the training dataset, 150 triples survived the first filtration, but only 3 triples survived filtration based on the second filtration dataset (two of these three triples included only genes from the core of the IS-core). Interestingly, filtration based solely on the second filtration set (without filtration based on the first dataset) provided almost the same result, keeping 4 triples.

In spite of relatively low thresholds used for filtration, both for breast cancer and colorectal cancer all triples that survived the filtration confirmed their prognostic potential as for the validation dataset they gave AUC value of at least 0.6.

### ***Interplay of the IS-network core and Myc***

The interplay between the genes forming the core of the IS-network and a number of well-studied transcription factors (including p53, Myc family, Fos family, Jun family) was analyzed based on published papers. The sources were found in PubMed and Google Scholar using search requests of the form “ $G$  and  $T$ ”, where  $G$  and  $T$  were a gene from the network core and a transcription factor, respectively (or, more precisely, gene symbols associated with the gene and the transcription factor). The analysis showed that in contrast with other studied transcription factors, the Myc family has a remarkable functional connection with the core of the IS-network.

Myc family proteins activate transcription of *MCM7*<sup>2,3</sup> and *RCL1*<sup>4,5</sup> genes and inhibit expression of *CTDSP1*<sup>6</sup> and *ABCF1*<sup>7</sup> genes. For *EIF4H* and *HNRNPK*, binding of N-myc at their promoters has been shown, as well as N-myc-dependent expression of intronic miRNAs of these genes<sup>8</sup>. Furthermore, products of the *EIF4H* and *HNRNPK* genes enhance translation of c-Myc

mRNA<sup>9,10</sup>. For the genes *SMC4*, *MCM7*, *FASTKD2*, and *HUWE1*, a direct protein-protein interaction with c-Myc or N-Myc has been reported<sup>11-14</sup>.

Additionally, Myc regulates expression of intronic miRNAs that induce intergenic interactions of the core genes represented by edges of the network. Specifically, it activates expression of the mir-15b/16-2 cluster<sup>15</sup>, the mir-25/93/106b cluster<sup>3</sup>, mir-7-1<sup>16</sup>, and mir-590<sup>8</sup>, and inhibits expression of mir-26b<sup>6</sup>, mir-101<sup>17</sup>, and mir-877<sup>8</sup>. Furthermore, miR-16-5p, miR-25-3p and miR-98-5p target c-Myc<sup>18,19</sup>, miR-103 targets the c-Myc activators c-Myb and *DVLL1*, thereby reducing c-Myc expression<sup>20</sup>, and miR-101-3p targets N-Myc<sup>18,19,21</sup>.

The described interplay between the core of the IS-network and the Myc family of transcription factors is summarized in Supplementary Fig. 9.

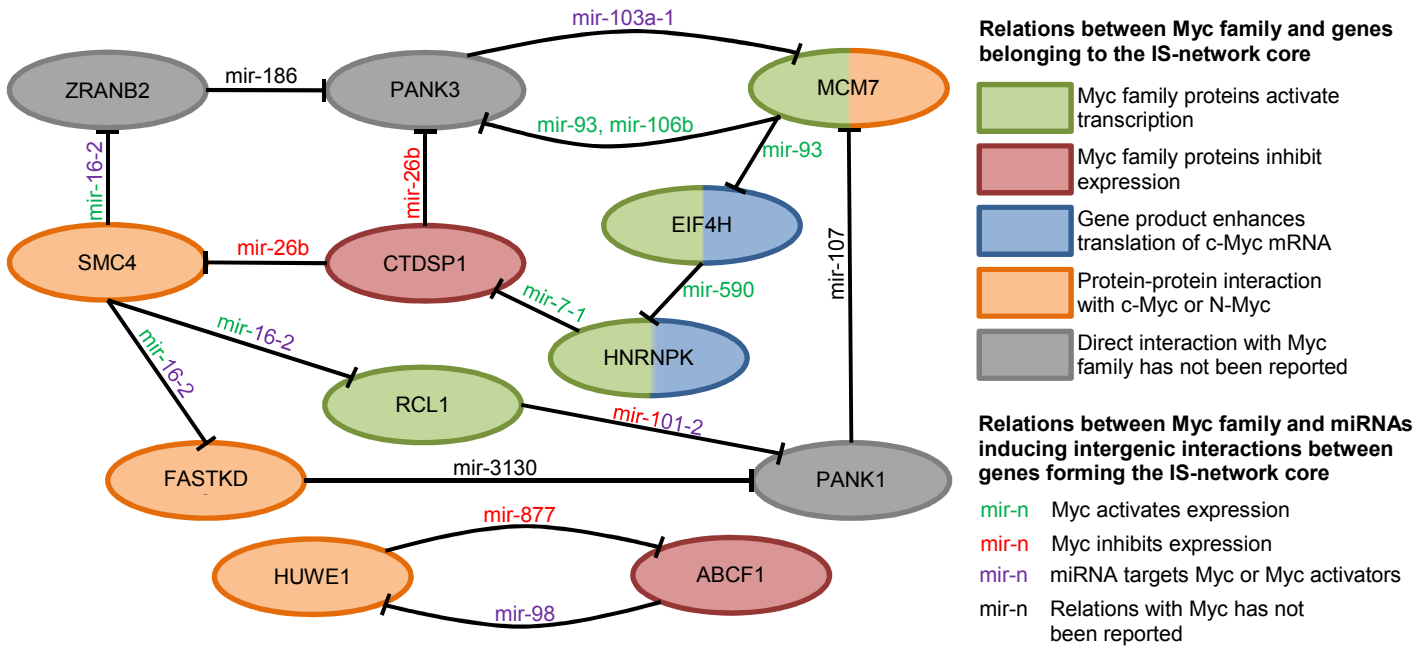

**Supplementary Figure 9 | Interplay of the IS-network core and Myc family of transcription factors.**

### *Cross-validation of the identified triples of genes on the training datasets*

Results of 3-fold cross-validation of the identified triples of genes on the training datasets are summarized in Supplementary Table 7. For each triple 10,000 cross-validation runs were performed, preserving initial proportion of classes in folds.

In case of 10-fold cross-validation variation of the characteristics was expectedly higher, primarily due to a very small number of patients with recurrence in test fold, which resulted in a very coarse discretization. Yet, the results were highly consistent with the results of 3-fold cross-validation and additionally proved the absence of overfitting. Specifically, lower quartiles of sensitivity and specificity obtained by 10,000 cross-validation runs were at least 50% for all the triples, and lower quartiles for AUC was at least 0.6. Moreover, median AUC was 0.697 for the colorectal cancer triple, 0.7 for two breast cancer triples, and 0.733 for the third breast cancer triple.

**Supplementary Table 7 | Results of 3-fold cross-validation on the training dataset.** For each characteristic the table presents its median value and interquartile range.

| Triple                | Pathology         | Cross-validation results |                         |                         |
|-----------------------|-------------------|--------------------------|-------------------------|-------------------------|
|                       |                   | Sensitivity              | Specificity             | AUC                     |
| HNRNPK, PANK3, SMC4   | Breast cancer     | 64.3%<br>[50.0%, 71.4%]  | 62.3%<br>[56.6%, 67.9%] | 0.697<br>[0.654, 0.739] |
| MCM7, PANK3, SMC4     | Breast cancer     | 57.1%<br>[50.0%, 71.4%]  | 64.2%<br>[60.4%, 69.8%] | 0.690<br>[0.644, 0.733] |
| MAP2K4, PANK3, SMC4   | Breast cancer     | 64.3%<br>[57.1%, 71.4%]  | 66.0%<br>[62.3%, 69.8%] | 0.726<br>[0.686, 0.768] |
| FASTKD2, PANK1, HUWE1 | Colorectal cancer | 61.0%<br>[56.1%, 65.9%]  | 65.4%<br>[61.7%, 69.1%] | 0.693<br>[0.665, 0.721] |

### Supplementary references

1. Ewens, W. J. On estimating P values by the Monte Carlo method. *Am. J. Hum. Genet.* **72**, 496–498 (2003).
2. Shohet, J. M. et al. Minichromosome maintenance protein MCM7 is a direct target of the MYCN transcription factor in neuroblastoma. *Cancer Res.* **62**, 1123–1128 (2002).
3. Zhao, Z. N. et al. TSA suppresses miR-106b-93-25 cluster expression through downregulation of MYC and inhibits proliferation and induces apoptosis in human EMC. *PLoS One* **7**, e45133 (2012).
4. Ciribilli, Y., Singh, P., Inga, A. & Borlak, J. c-Myc targeted regulators of cell metabolism in a transgenic mouse model of papillary lung adenocarcinoma. *Oncotarget* **7**, 65514–65539 (2016).
5. Tworkowski, K. A. et al. Adenovirus E1A targets p400 to induce the cellular oncoprotein Myc. *Proc. Natl. Acad. Sci. U S A* **105**, 6103–6108 (2008).
6. Chang, T. C. et al. Widespread microRNA repression by Myc contributes to tumorigenesis. *Nat. Genet.* **40**, 43–50 (2008).
7. Porro, A. et al. Direct and coordinate regulation of ATP-binding cassette transporter genes by Myc factors generates specific transcription signatures that significantly affect the chemoresistance phenotype of cancer cells. *J. Biol. Chem.* **285**, 19532–19543 (2010).
8. Shohet, J. M. et al. A genome-wide search for promoters that respond to increased MYCN reveals both new oncogenic and tumor suppressor microRNAs associated with aggressive neuroblastoma. *Cancer Res.* **71**, 3841–3851 (2011).
9. Vaysse, C. et al. Key contribution of eIF4H-mediated translational control in tumor promotion. *Oncotarget* **6**, 39924–39940 (2015).
10. Evans, J. et al. Members of the poly (rC) binding protein family stimulate the activity of the c-myc internal ribosome entry segment in vitro and in vivo. *Oncogene* **22**, 8012–8020 (2003).
11. Murakami-Tonami, Y. et al. Inactivation of SMC2 shows a synergistic lethal response in MYCN-amplified neuroblastoma cells. *Cell Cycle* **13**, 1115–1131 (2014).
12. Dominguez-Sola, D, et al. Non-transcriptional control of DNA replication by c-Myc. *Nature* **448**, 445–451 (2007).
13. Ewing, R. M. et al. Large-scale mapping of human protein-protein interactions by mass spectrometry. *Mol. Syst. Biol.* **3**, 89 (2007).
14. Adhikary, S. et al. The ubiquitin ligase Hecth9 regulates transcriptional activation by Myc and is essential for tumor cell proliferation. *Cell* **123**, 409–421 (2005).
15. Mestdagh, P. et al. MYCN/c-MYC-induced microRNAs repress coding gene networks associated with poor outcome in MYCN/c-MYC-activated tumors. *Oncogene* **29**, 1394–1404 (2010).
16. Chou, Y. T. et al. EGFR promotes lung tumorigenesis by activating miR-7 through a Ras/ERK/Myc pathway that targets the Ets2 transcriptional repressor ERF. *Cancer Res.* **70**, 8822–8831 (2010).
17. Wang, L. et al. c-Myc-mediated epigenetic silencing of MicroRNA-101 contributes to dysregulation of multiple pathways in hepatocellular carcinoma. *Hepatology* **59**, 1850–1863 (2014).
18. Vlachos, I. S. et al. DIANA-TarBase v7.0: indexing more than half a million experimentally supported miRNA:mRNA interactions. *Nucleic Acids Res.* **43 (Database issue)**, D153–D159 (2015).
19. Chou, C. H. et al. miRTarBase 2016: updates to the experimentally validated miRNA-target interactions database. *Nucleic Acids Res.* **44 (D1)**, D239–D247 (2016).
20. Kfir-Erenfeld, S. et al. miR-103 inhibits proliferation and sensitizes hemopoietic tumor cells for glucocorticoid-induced apoptosis. *Oncotarget* **8**, 472–489 (2017).
21. Buechner, J. et al. Tumour-suppressor microRNAs let-7 and mir-101 target the proto-oncogene MYCN and inhibit cell proliferation in MYCN-amplified neuroblastoma. *Br. J. Cancer* **105**, 296–303 (2011).
